# Supplementary material for: Effects of aging on glucose and lipid metabolism in mice
Source: PubMed Central journal article supplement — bioRxiv. 2023 Dec 18:2023.12.17.572088. Preprint. [Version 1] doi: 10.1101/2023.12.17.572088 (PMC10769226; doi:10.1101/2023.12.17.572088), 2023-12-18

**A**

Pyruvate M+3

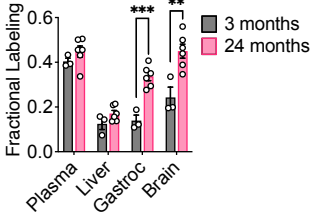**B**

Lactate M+3

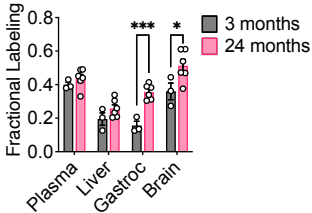

Supplement: media-3.pdf [file media-3.pdf]
