# Supplementary material for: Effects of aging on glucose and lipid metabolism in mice
Source: PubMed Central journal article supplement — bioRxiv. 2023 Dec 18:2023.12.17.572088. Preprint. [Version 1] doi: 10.1101/2023.12.17.572088 (PMC10769226; doi:10.1101/2023.12.17.572088), 2023-12-18
Supplement: media-14.pdf [file media-14.pdf]

**A**

C57BL/6J

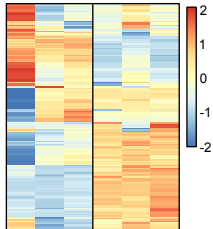

3 months 24 months

**B**

WSB/EiJ

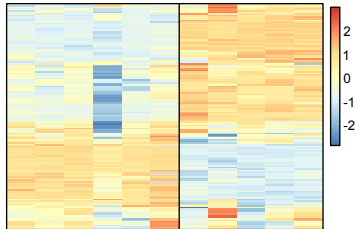

3 months 24 months

**C**

DO

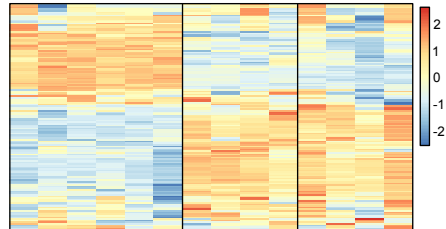

3 months 24 months 30 months
